# Supplementary material for: Tuning non-radiative decay channelsviasymmetric/asymmetric substituent effects on phenazine derivatives and their phototherapy switch between dynamic and thermal processes
Source: Royal Society of Chemistry journal article supplement (doi:10.1039/d1qm01385h), 2021-12-16
Supplement: d1qm01385h1.pdf [file d1qm01385h1.pdf]

## Supporting Information

### Tuning Non-Radiative Decay Channels via Symmetric/Asymmetric Substituent Effects on Phenazine Derivative and Their Phototherapy Switch Between Dynamic and Thermal Process

*Yuxuan Li,<sup>a</sup> Keke Ding,<sup>b</sup> Haozhong Wu,<sup>a</sup> Qing Wan,<sup>c</sup> Yao Ma,<sup>a</sup> Yuhua Huang,<sup>b</sup> Zhiming Wang<sup>\*a</sup>, Weijie Zhang<sup>\*b</sup>, Jianquan Hou<sup>\*b</sup>, Ben Zhong Tang<sup>\*a</sup>*

#### 1. General information

All reagents and solvents were purchased through commercial channels, without secondary purification. Phenazine, sodium hydroxide, sodium hydrosulfite, phosphorus oxychloride, anhydrous magnesium sulfate, malononitrile and ammonium acetate were bought from Energy Chemical Corporation. Bromoethane was purchased from TCI Shanghai Corporation. DSPE-PEG-Mal ( $M_w = 2,000$ ) was purchased from Laysan Bio Inc. (Arab, AL, U.S.A.). Phosphate-buffered saline (PBS), RPMI 1640 medium (with L-glutamine), fetal bovine serum (FBS), 0.25% Trypsin-EDTA, were obtained from Gibco™ Life Technologies. Penicillin–streptomycin (PEST) solution was purchased from Biosharp (Hefei, China). Cell viability test was measured using the Cell Counting Kit-8 (CCK8, Dojindo, Japan). 2',7'-dichlorodihydrofluorescein diacetate (DCFH-DA) were obtained from Aladdin Co., Ltd. HIV-1 Tat derivant modified with cysteine on C-terminus (RKKRRQRRRC) was customized by Genic Bio (Shanghai, China). The chemical structure of products had been confirmed by nuclear magnetic resonance, high-resolution mass spectrometry, elemental analysis and other analytical methods.  $^1\text{H}$  and  $^{13}\text{C}$  NMR spectra were recorded on a Bruker AV 400/500 spectrometer in DMSO or  $\text{C}_6\text{D}_6$  at room temperature. High-resolution mass spectra were obtained from Agilent1290 / Bruker maXis impact. Elemental analysis results were measured by Vario EL cube. The UV-vis spectra and PL spectra were carried out by a Shimadzu UV-2600 spectrophotometer and Horiba Fluoromax-4 spectrofluorometer. The absolute fluorescence quantum efficiency was recorded on Hamamatsu absolute PL quantum yield spectrometer C11347 Quantaurus\_QY. Electron paramagnetic resonance spectra were conducted on a Bruker ELEXSYS II. The Confocal laser

scanning microscopy images was obtained by LSM 880 confocal laser scanning microscope.

## 2. Synthetic route

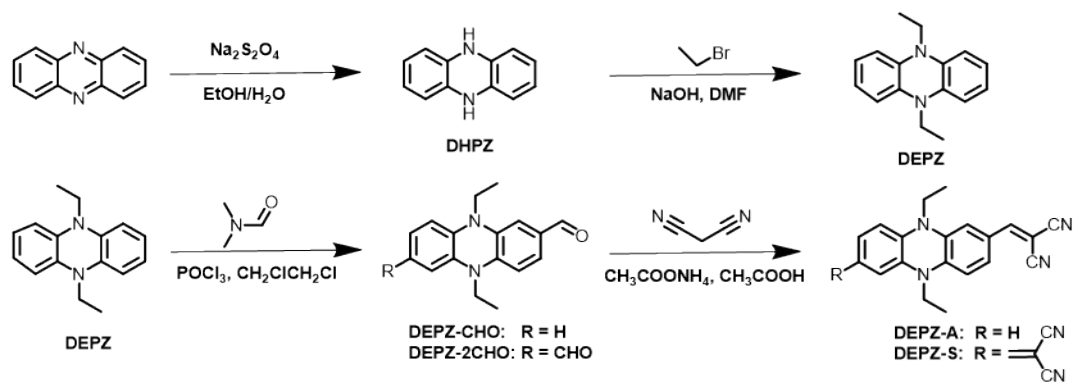

Fig. S1 The synthesis routes of DEPZ-S and DEPZ-A

## 3. Additional data

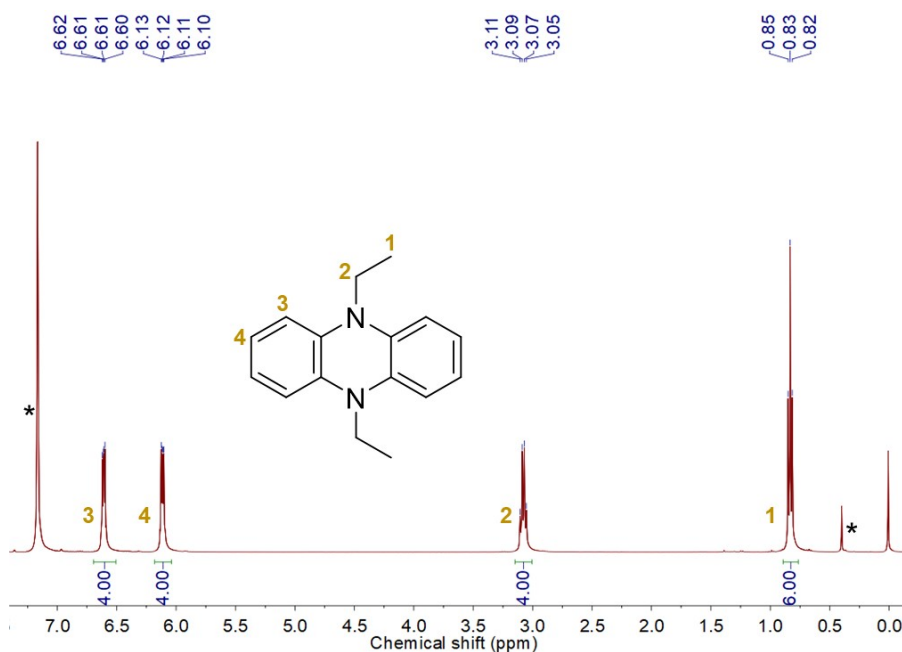

Fig. S2 <sup>1</sup>H NMR spectrum of DEPZ in C<sub>6</sub>D<sub>6</sub> at 298K.

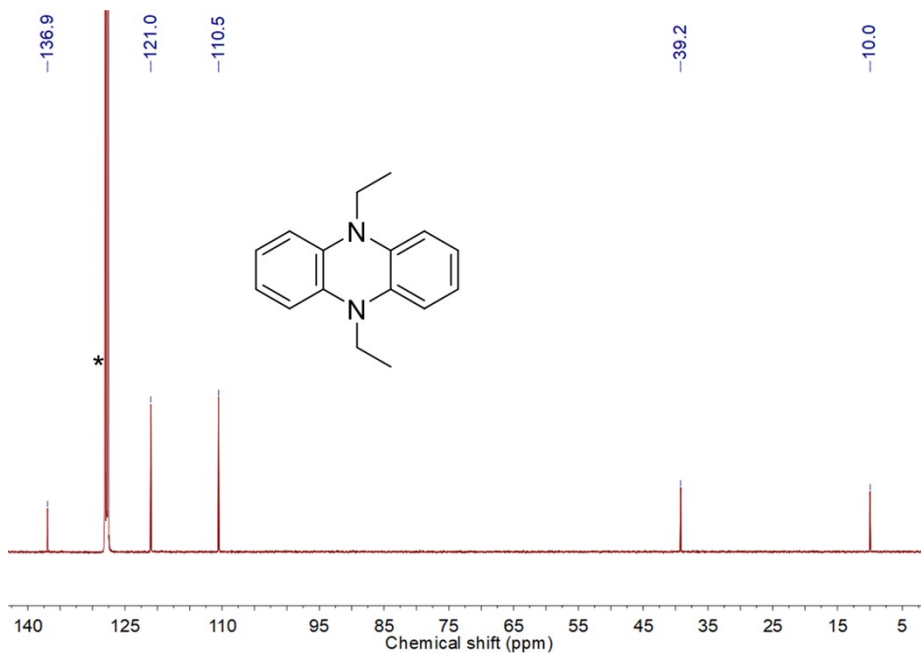

**Fig. S3**  $^{13}\text{C}$  NMR spectrum of DEPZ in  $\text{C}_6\text{D}_6$  at 298K.

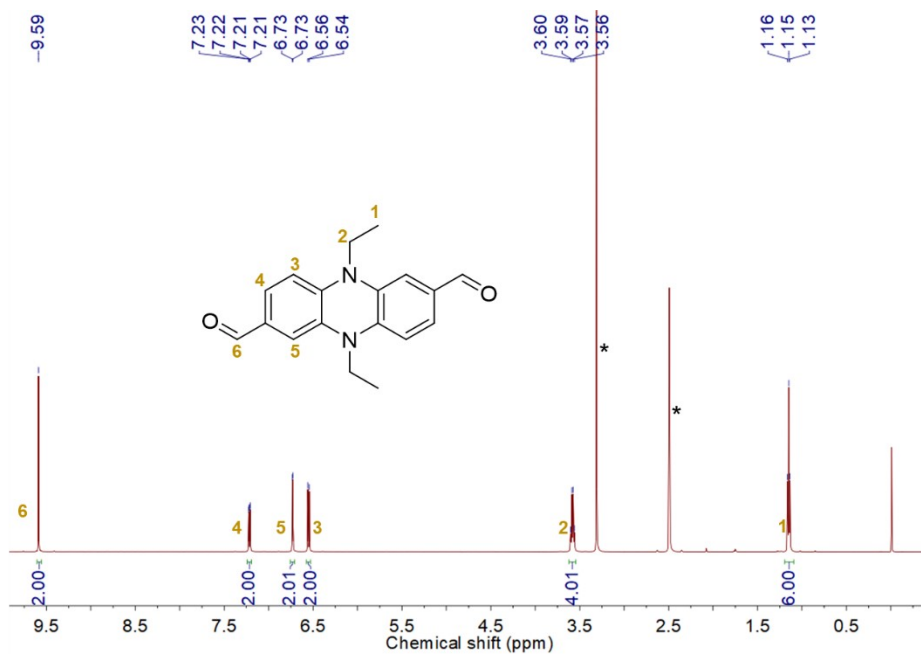

**Fig. S4**  $^1\text{H}$  NMR spectrum of DEPZ-2CHO in DMSO at 298K.

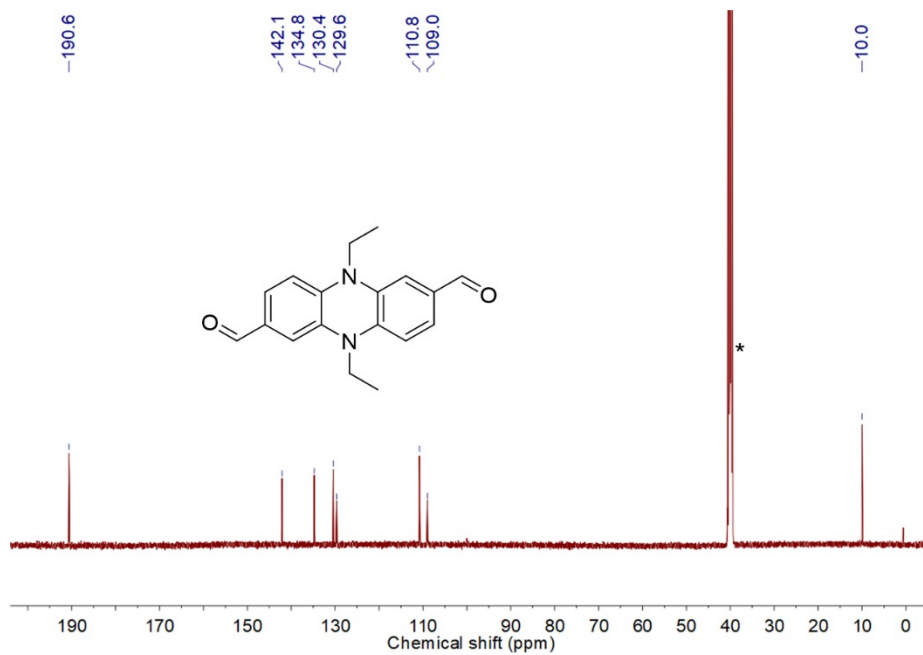

**Fig. S5** <sup>13</sup>C NMR spectrum of DEPZ-2CHO in DMSO at 298K.

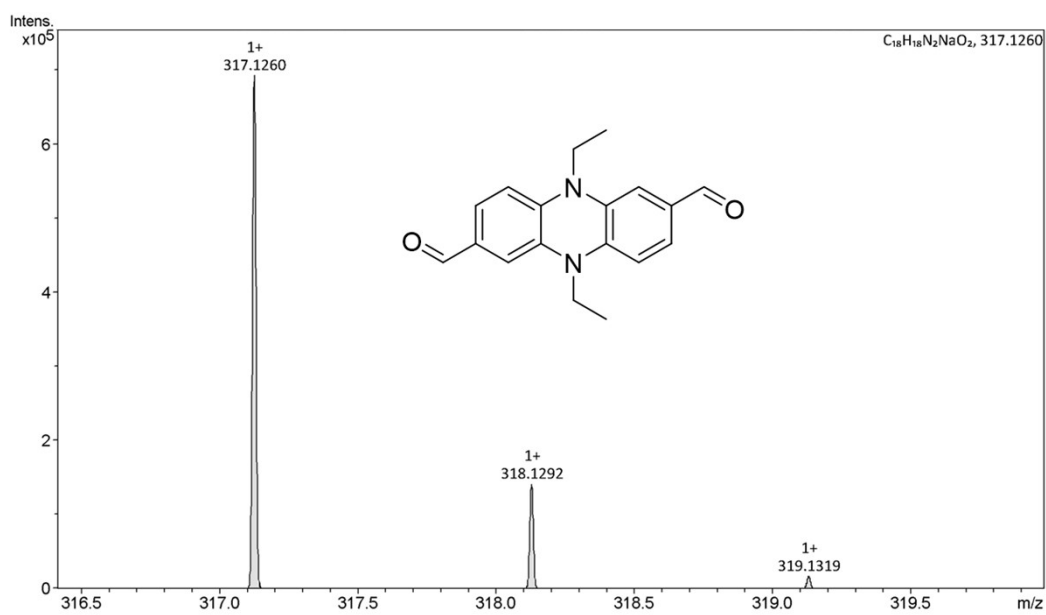

**Fig. S6** HRMS spectrum of DEPZ-2CHO.

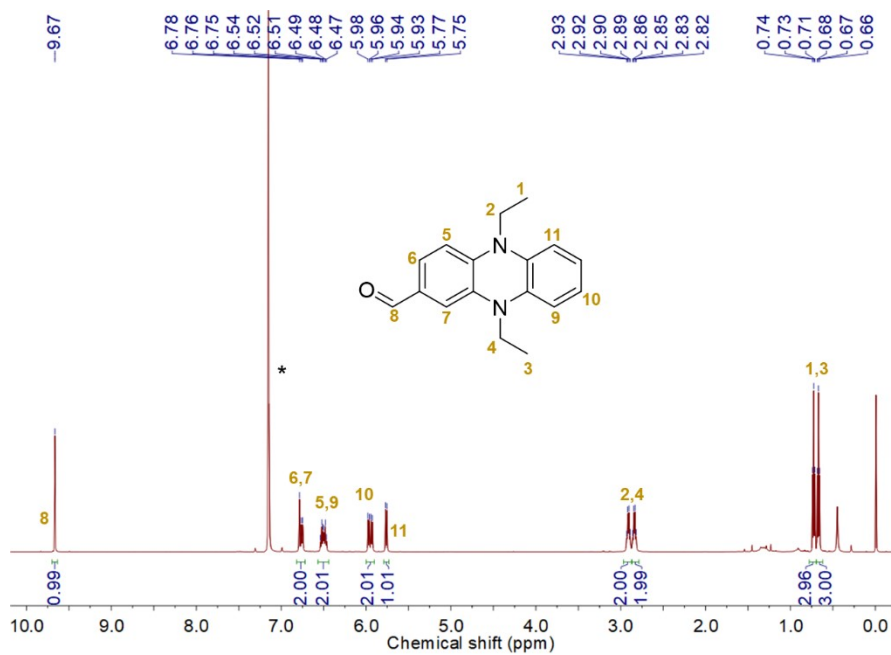

Fig. S7 <sup>1</sup>H NMR spectrum of DEPZ-CHO in C<sub>6</sub>D<sub>6</sub> at 298K.

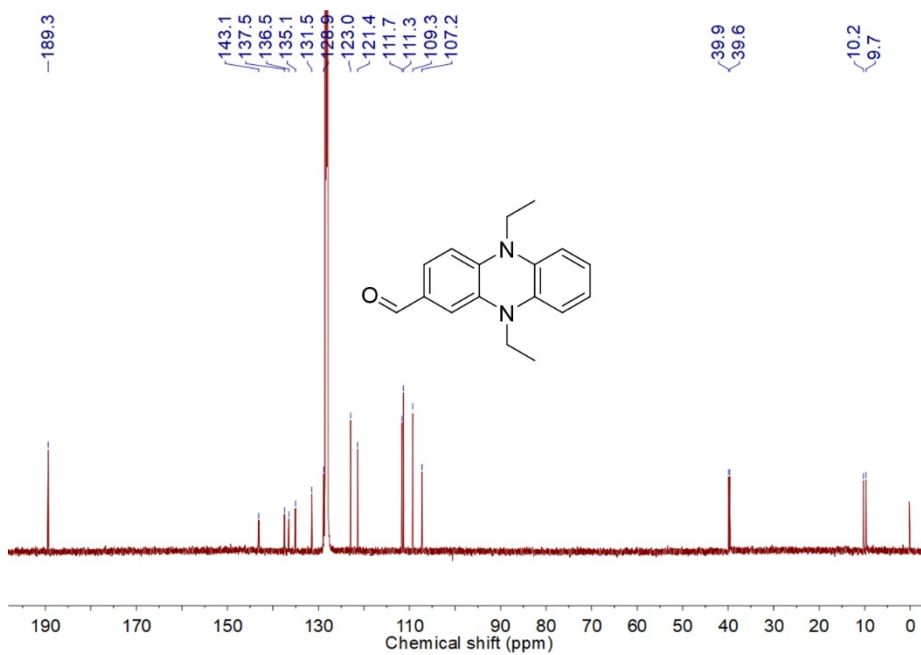

Fig. S8 <sup>13</sup>C NMR spectrum of DEPZ-CHO in C<sub>6</sub>D<sub>6</sub> at 298K.

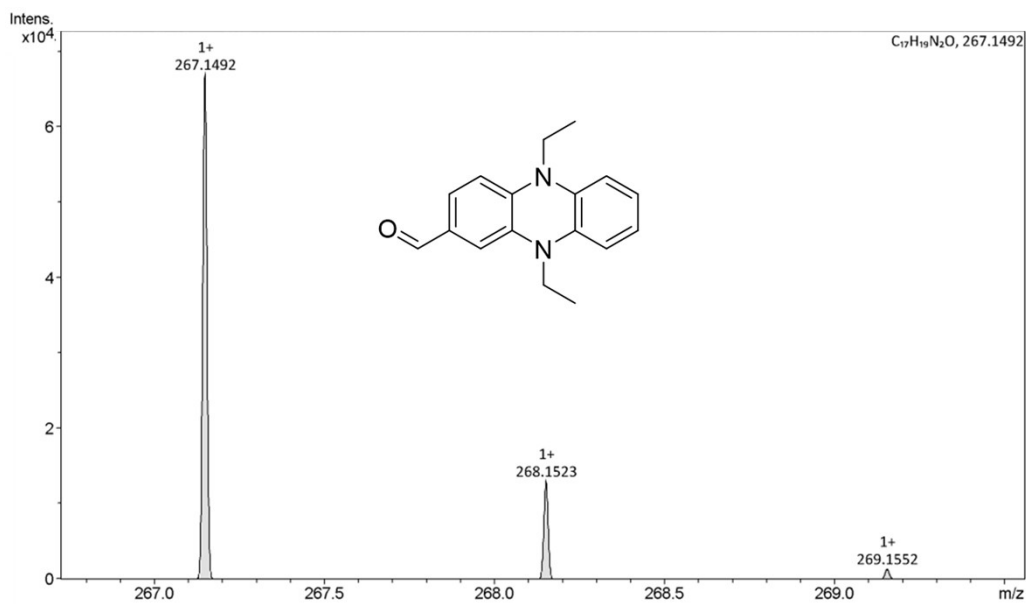

**Fig. S9** HRMS spectrum of DEPZ-CHO.

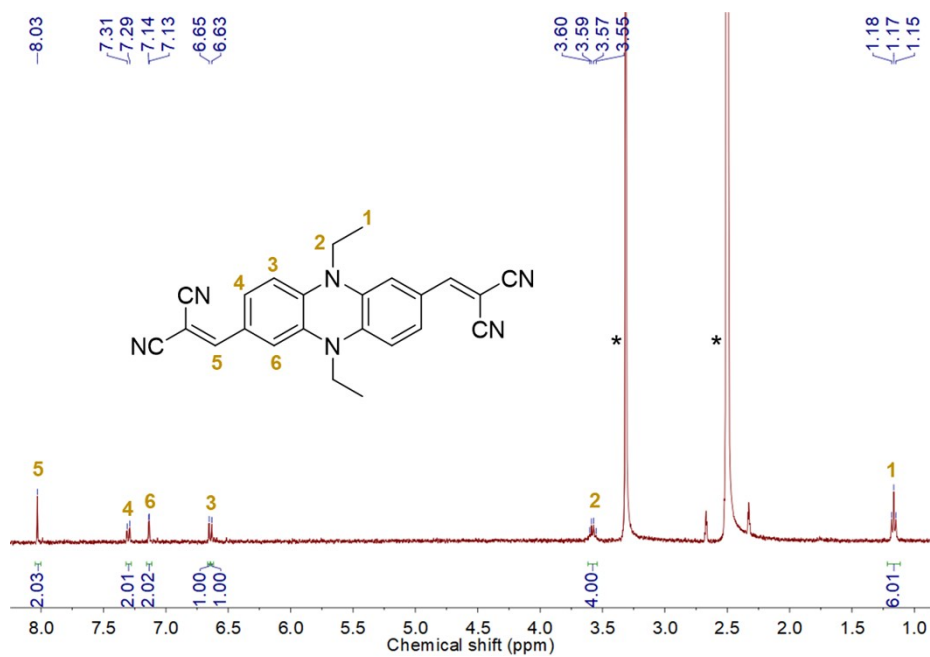

**Fig. S10** <sup>1</sup>H NMR spectrum of DEPZ-S in DMSO at 298K.

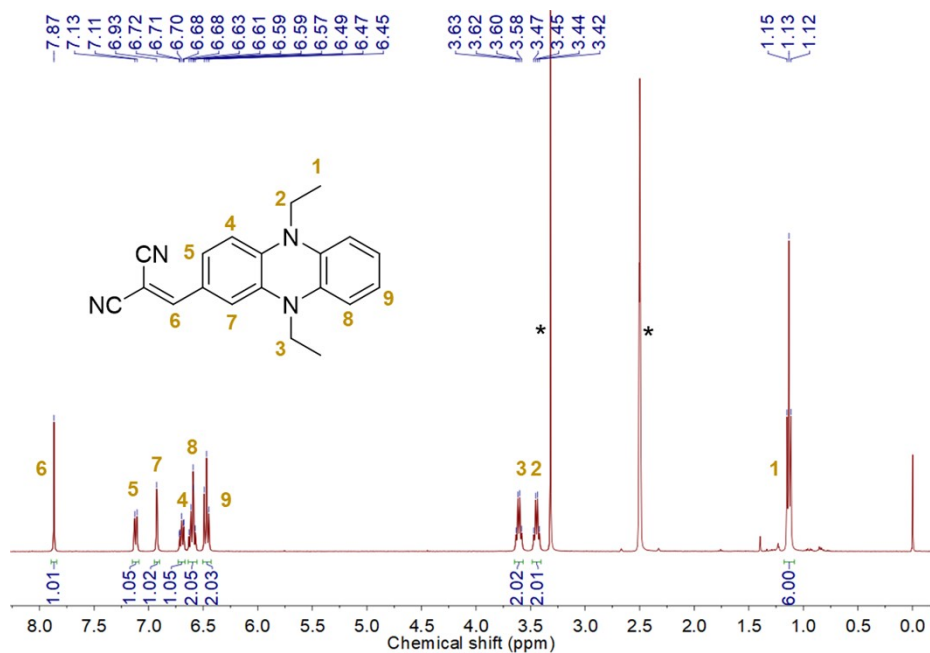

Fig. S11  $^1\text{H}$  NMR spectrum of DEPZ-A in DMSO at 298K.

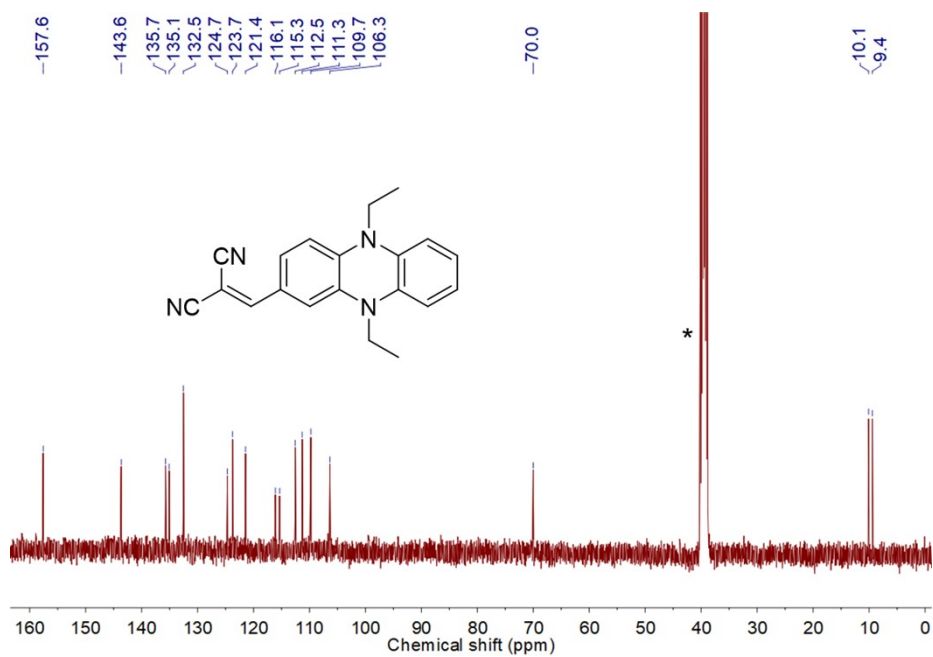

Fig. S12  $^{13}\text{C}$  NMR spectrum of DEPZ-A in DMSO at 298K.

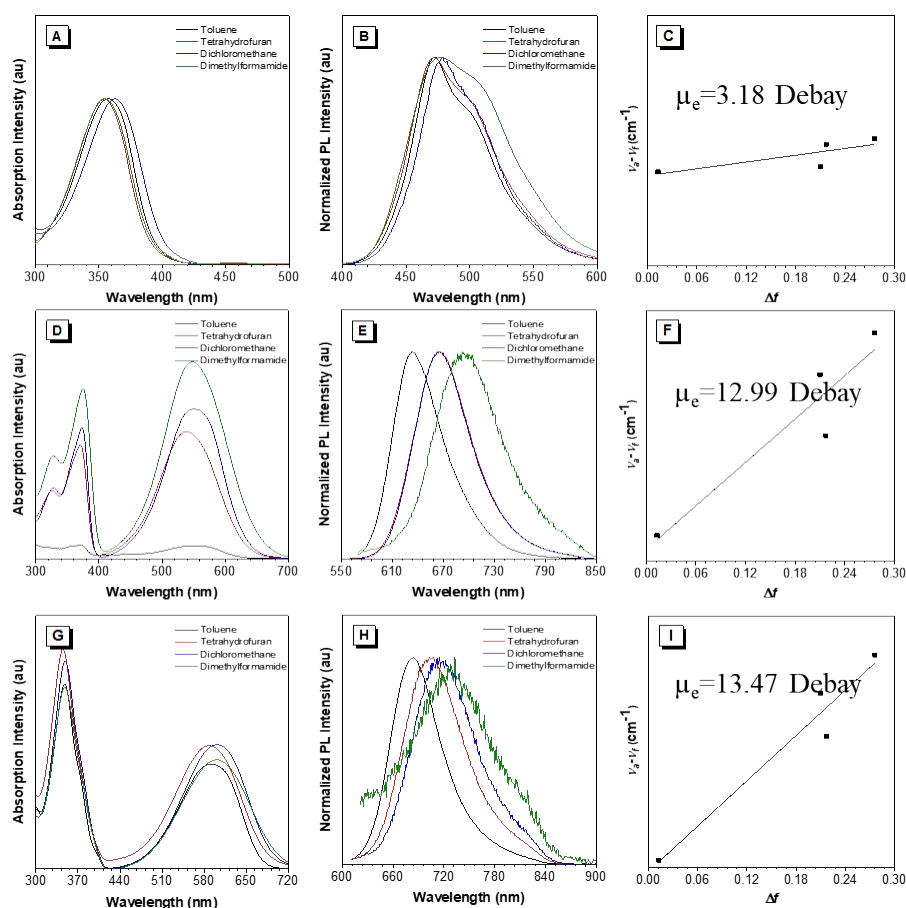

**Fig. S13** Solvatochromic absorption spectra of (A) DEPZ, (D) DEPZ-S and (G) DEPZ-A; Solvatochromic PL spectra of (B) DEPZ, (E) DEPZ-S and (H) DEPZ-A; Solvatochromic Lippert-Mataga models of (C) DEPZ, (F) DEPZ-S and (I) DEPZ-A, concentration: 10  $\mu\text{M}$ .

**Table 1.** Detailed data of DEPZ in different solvents.

| Solvents           | $\epsilon$ | n     | $f(\epsilon, n)$ | $\lambda_{\text{abs}}^{\text{a)}$ | $\lambda_{\text{em}}^{\text{b)}$ | Stokes shift |
|--------------------|------------|-------|------------------|-----------------------------------|----------------------------------|--------------|
|                    |            |       |                  | [nm]                              | [nm]                             |              |
| Toluene            | 2.38       | 1.496 | 0.013            | 358                               | 472                              | 6747         |
| Tetrahydrofuran    | 7.58       | 1.407 | 0.210            | 358                               | 472                              | 6791         |
| Dichloromethane    | 8.93       | 1.424 | 0.217            | 358                               | 476                              | 6969         |
| Dimethyl Formamide | 37.00      | 1.427 | 0.276            | 358                               | 478                              | 7012         |

<sup>a)</sup>Maximum absorption wavelength; <sup>b)</sup>Maximum emission wavelength, concentration: 10  $\mu\text{M}$



**Table 2.** Detailed data of DEPZ-S in different solvents.

| Solvents           | $\epsilon$ | n     | $f(\epsilon, n)$ | $\lambda_{\text{abs}}^{\text{a)}$<br>[nm] | $\lambda_{\text{em}}^{\text{b)}$<br>[nm] | Stokes shift<br>[ $\text{cm}^{-1}$ ] |
|--------------------|------------|-------|------------------|-------------------------------------------|------------------------------------------|--------------------------------------|
| Toluene            | 2.38       | 1.496 | 0.013            | 551                                       | 633                                      | 2351                                 |
| Tetrahydrofuran    | 7.58       | 1.407 | 0.210            | 538                                       | 665                                      | 3550                                 |
| Dichloromethane    | 8.93       | 1.424 | 0.217            | 553                                       | 665                                      | 3046                                 |
| Dimethyl Formamide | 37.00      | 1.427 | 0.276            | 546                                       | 696                                      | 3947                                 |

<sup>a)</sup>Maximum absorption wavelength; <sup>b)</sup>Maximum emission wavelength, concentration: 10  $\mu\text{M}$

**Table 3.** Detailed data of DEPZ-A in different solvents.

| Solvents           | $\epsilon$ | n     | $f(\epsilon, n)$ | $\lambda_{\text{abs}}^{\text{a)}$<br>[nm] | $\lambda_{\text{em}}^{\text{b)}$<br>[nm] | Stokes shift<br>[ $\text{cm}^{-1}$ ] |
|--------------------|------------|-------|------------------|-------------------------------------------|------------------------------------------|--------------------------------------|
| Toluene            | 2.38       | 1.496 | 0.013            | 593                                       | 683                                      | 2222                                 |
| Tetrahydrofuran    | 7.58       | 1.407 | 0.210            | 589                                       | 704                                      | 2773                                 |
| Dichloromethane    | 8.93       | 1.424 | 0.217            | 600                                       | 715                                      | 2681                                 |
| Dimethyl Formamide | 37.00      | 1.427 | 0.276            | 602                                       | 728                                      | 2875                                 |

<sup>a)</sup>Maximum absorption wavelength; <sup>b)</sup>Maximum emission wavelength, concentration: 10  $\mu\text{M}$ .

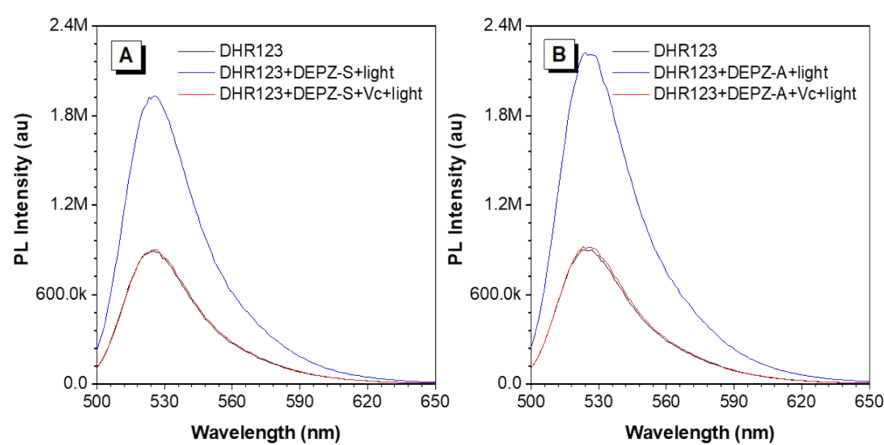

**Fig. S14** Time-dependent changes of PL intensities for DHR123 (10  $\mu\text{M}$ ) with Vc (10  $\mu\text{M}$ ), (A) DEPZ-S (10  $\mu\text{M}$ ), (B) DEPZ-A (10  $\mu\text{M}$ ) in DMSO/PBS (v/v=1:9).

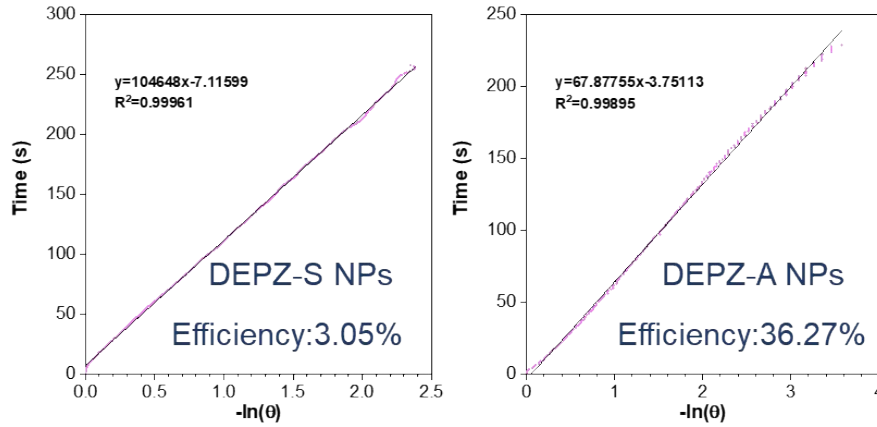

**Fig. S15** The linear fitting of time the cooling period vs. negative natural logarithm of driving force temperature for DEPZ-S NPs and DEPZ-A NPs.

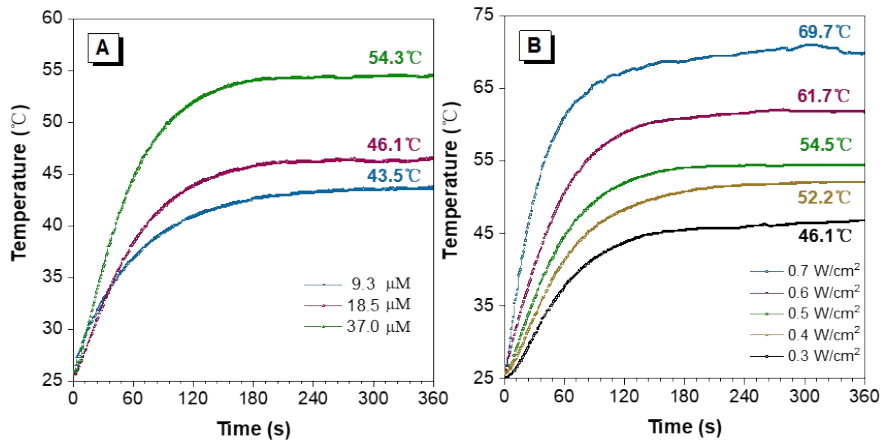

**Fig. S16** (A) Photothermal curves of DEPZ-A nanoparticles at different concentrations under 660 nm laser ( $0.5 \text{ W}/\text{cm}^2$ ) for 6 min. (B) Photothermal curves of DEPZ-A nanoparticles irradiated by 660 nm laser of different power density gradients for 6 min, concentration:  $37 \mu\text{M}$ .

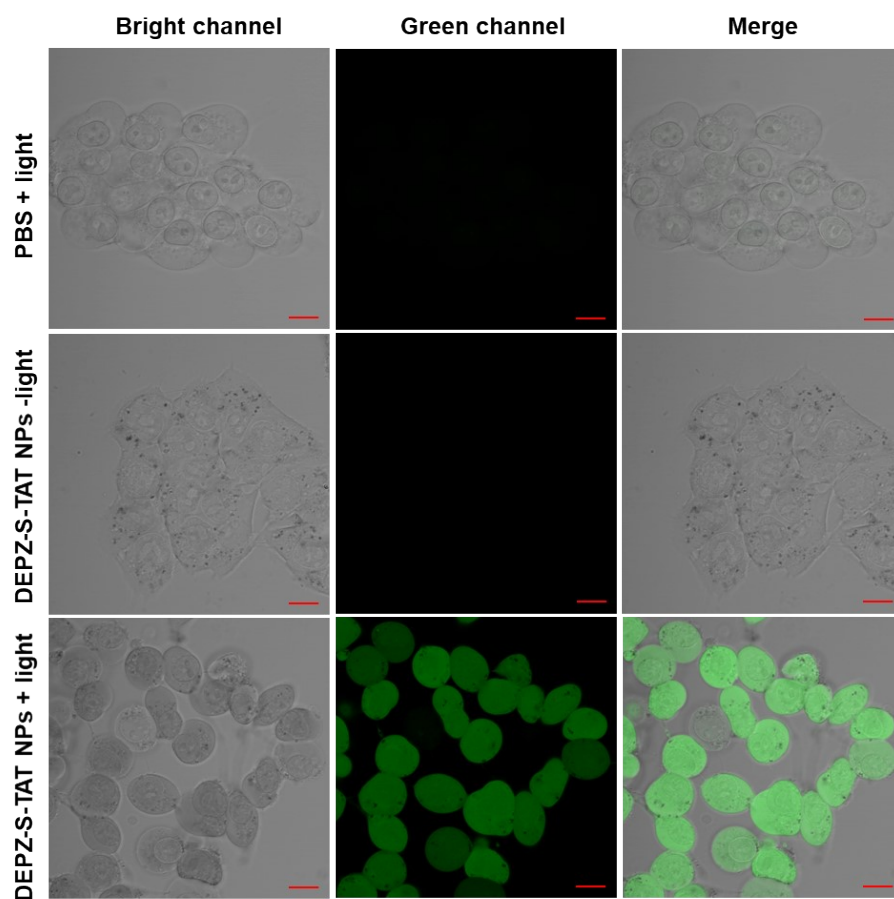

**Fig. S17** CLSM images of intracellular ROS in MB49 cells using H2DCFH-DA with DEPZ-S-TAT nanoparticles (32  $\mu$ M) upon diverse treatments. Scale bar: 10  $\mu$ m.
